# Supplementary material for: Comparative Genomic Analyses of Flavobacterium psychrophilum Isolates Reveals New Putative Genetic Determinants of Virulence Traits
Source: MDPI journal article supplement (doi:10.3390/microorganisms9081658), 2021-08-03
Supplement: s1 [file s1]

## Dispensable genome

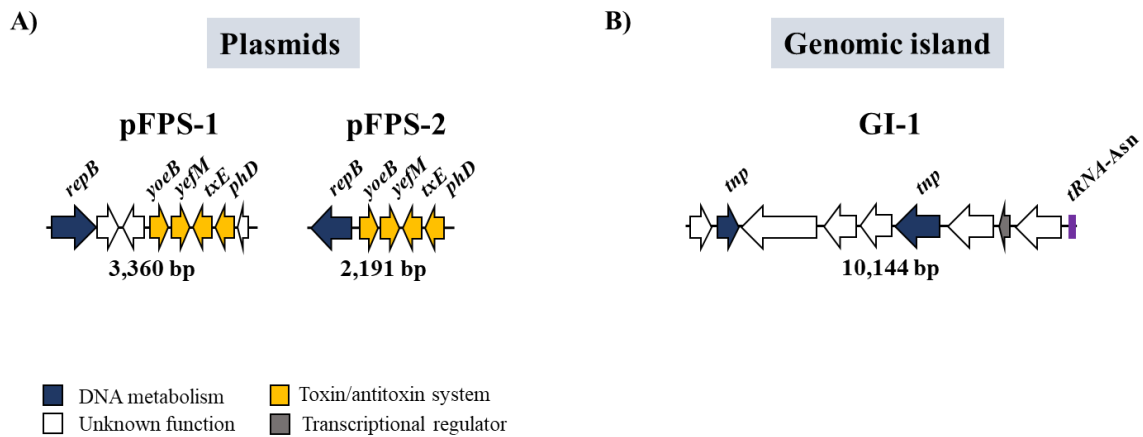

**Figure 2S. Schematic representation of dispensable genome in *F. psychrophilum* isolates.** A) Plasmids sequences of 3,3 and 2,1 kb were found in 15 out of 26 *F. psychrophilum* isolates (Table 1). B) Genomic island of 10.1 kb found in the *F. psychrophilum* isolates FPS-G1, FPS-S6, FPS-P1 and FPS-P3 (H0I59\_05470-H0I59\_05510). Genes are represented as arrows. Functions for genes are indicated in colored boxes
