# Supplementary material for: Comparative Genomic Analyses of Flavobacterium psychrophilum Isolates Reveals New Putative Genetic Determinants of Virulence Traits
Source: MDPI journal article supplement (doi:10.3390/microorganisms9081658), 2021-08-03
Supplement: s1 [file s1]

**Table 4S.** Amino acid sequences of repetitive motifs in *F. psychrophilum* isolates

| Isolate                | Locus tag   | Number of repetitions | Motif consensus sequence                                                                 |
|------------------------|-------------|-----------------------|------------------------------------------------------------------------------------------|
| JIPO2/86               | FP2519      | 30                    | DYTTTVTTVTI.PAGQxTTVNVTVP<br>I                                                           |
|                        |             | 19                    | DTIDEPAETFTVNGTV                                                                         |
|                        |             | 6                     | ITTATGTAGTS                                                                              |
| NCIMB1947 <sup>T</sup> | FPG3_01745  | 32                    | VNVTV <sub>xx</sub> PILEDTID <sub>xx</sub> EPAETF <sub>xxx</sub> T<br>V <sub>x</sub> NG  |
|                        |             | 21                    | TAGTS <sub>x</sub> DYT <sub>xx</sub> TTVTT <sub>xx</sub> VT <sub>xxxxx</sub> IP<br>AGQTT |
| 950106-1/1             | H0H25_07270 | 51                    | INEG <sub>x</sub> AGTVTI <sub>p</sub> VSID <sub>v</sub> VSSVDTVIN                        |
|                        |             | 18                    | LEDTIDEPAETFTV <sub>x</sub> NGTVTS                                                       |
| FPS-R7                 | H0H26_09970 | 32                    | TYTLTVTNTS <sub>x</sub> NGCTSTNSVI <sub>xx</sub> VT<br>VDKTAPTAT                         |
| 160401-1/5N            | E5165_12645 | 66                    | ILEDTIdePAETFTVNGTV                                                                      |
|                        |             | 21                    | ATIGNVTINEGAGTVTIPVSIDVVS<br>SVDTVINITTATGTAGTSDYTTT                                     |
| FPS-S6                 | E5164_01700 | 46                    | INEG.AGTVTI <sub>p</sub> VSID <sub>v</sub> VSSVDTVIN                                     |
|                        |             | 36                    | DTIDEPAETFTVNGTV                                                                         |
|                        |             | 11                    | ITTATGTAGTS                                                                              |
