# Supplementary material for: Comparative Genomic Analyses of Flavobacterium psychrophilum Isolates Reveals New Putative Genetic Determinants of Virulence Traits
Source: MDPI journal article supplement (doi:10.3390/microorganisms9081658), 2021-08-03
Supplement: s1 [file s1]

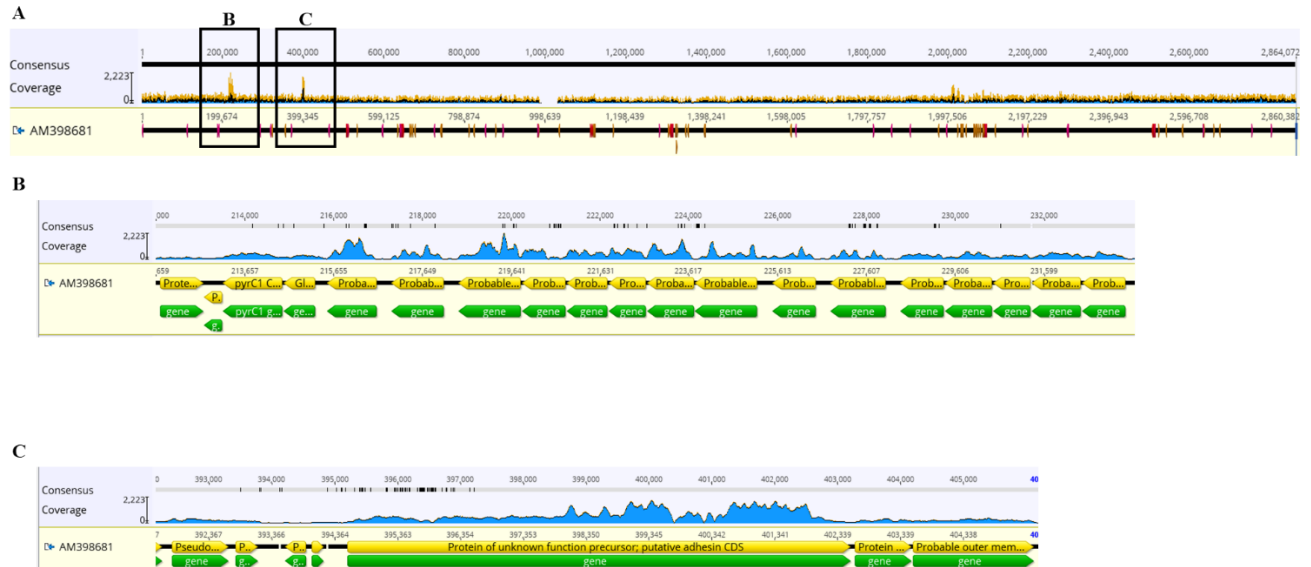

**Figure 3S. Graphic representation of mapped reads in *F. psychrophilum* isolate JIPO82/6 as a reference genome.** A) Full genome coverage by mapped reads (from Illumina sequencing technology) in the *F. psychrophilum* isolate JIPO82/6 (Accession number AM398681). Black squares highlight picks on genomic zones with high coverage (>1500x) compared with the coverage of the entire genome. B) Zoom in Leucine-rich repeat (LRR) ORFs. C) Zoom in putative adhesin or former gliding motility-associated protein. The genome coordinates, LRR and putative adhesin genes, read coverage, and mapped reads are shown in the figure. The *F. psychrophilum* isolate FPS-S6 is used as a representative model.
