# Supplementary material for: Comparative Genomic Analyses of Flavobacterium psychrophilum Isolates Reveals New Putative Genetic Determinants of Virulence Traits
Source: MDPI journal article supplement (doi:10.3390/microorganisms9081658), 2021-08-03
Supplement: s1 [file s1]

**Table 3S.** Distribution of genomic islands in *F. psychrophilum* isolates

| Genomic island | Isolate                 | Localization            | Size (kb) | Genetic feature(s)                                                                                                                                                                                                               |
|----------------|-------------------------|-------------------------|-----------|----------------------------------------------------------------------------------------------------------------------------------------------------------------------------------------------------------------------------------|
| 1              | FPS-R7                  | H0H26_09110-H0H26_09135 | 8.1       | N-acetyltransferase (H0H26_09120) and transporter (H0H26_09110)                                                                                                                                                                  |
| 2              |                         | H0H26_09230-H0H26_09505 | 46.1      | Prophage-like element                                                                                                                                                                                                            |
| 3              |                         | H0H26_10290-H0H26_10370 | 25.4      | DNA-methyltransferase (H0H26_10320) and helicase (H0H26_10360)                                                                                                                                                                   |
| 4              |                         | H0H26_11345-H0H26_11810 | 71.2      | Prophage-like element                                                                                                                                                                                                            |
| 5              |                         | H0H26_12900-H0H26_12930 | 10.4      | Lantibiotic dehydratase (H0H26_12920) and peptidase (H0H26_12910)                                                                                                                                                                |
| 6              |                         | H0H26_00790-H0H26_00875 | 12.2      | Unknown function proteins                                                                                                                                                                                                        |
| 7              |                         | H0H26_01960-H0H26_01995 | 8.0       | Fic protein (H0H26_01965)                                                                                                                                                                                                        |
| 8              |                         | H0H26_03655-H0H26_03720 | 16.9      | beta-lactamase (H0H26_03705)                                                                                                                                                                                                     |
| 9              |                         | H0H26_03910-H0H26_04225 | 82.3      | Transposases, unknown function proteins and T9SS type A sorting domain-containing protein (H0H26_04050)                                                                                                                          |
| 10             |                         | H0H26_03730-H0H26_04870 | 320       | Multicopper oxidase domain-containing protein (H0H26_04775), transporters (H0H26_04095- H0H26_04110), proteases (H0H26_04400), abortive infection proteins (H0H26_04445), beta-lactamase (H0H26_04585) and multiple transposases |
| 11             | NCIMB 1947 <sup>T</sup> | FPG3_04905-FPG3_04875   | 8.3       | Deoxyribonuclease (FPG3_04875)                                                                                                                                                                                                   |
| 12             |                         | FPG3_01405-FPG3_01440   | 9.6       | Unknown function proteins                                                                                                                                                                                                        |
| 13             | FPS-S6                  | E5164_12690-E5164_12785 | 18.1      | Fibrobacter succinogenes major paralogous domain-containing protein (E5164_12695) and unknown function proteins                                                                                                                  |
| 14             | 160401-1/5N             | E5165_12735-E5164_12785 | 18.1      | Fibrobacter succinogenes major paralogous domain-containing                                                                                                                                                                      |

|  |  |  |  |                                                        |
|--|--|--|--|--------------------------------------------------------|
|  |  |  |  | protein (E5164_12695) and<br>unknown function proteins |
|--|--|--|--|--------------------------------------------------------|
