# Supplementary material for: Comparative Genomic Analyses of Flavobacterium psychrophilum Isolates Reveals New Putative Genetic Determinants of Virulence Traits
Source: MDPI journal article supplement (doi:10.3390/microorganisms9081658), 2021-08-03
Supplement: s1 [file s1]

**Table 5S.** Distribution of transposase genes in *F. psychrophilum* isolates

| Strain                 | Locus tag   | Transposase type   | Genomic context                                                     | Functions                                      |
|------------------------|-------------|--------------------|---------------------------------------------------------------------|------------------------------------------------|
| FPSR7                  | H0H26_08935 | IS204 transposase  | Intergenic region between H0H26_08930 and H0H26_08945 genes         | Metabolic genes                                |
|                        | H0H26_08940 | IS204 transposase  | Intergenic region between H0H26_08930 and H0H26_08945 genes         | Metabolic genes                                |
| 950106-1/1             | H0H25_00805 | IS982 transposase  | Intergenic region between H0H25_00800 and H0H25_00810 genes         | Metabolic genes                                |
| 160401-1/5N            | E5165_03945 | IS982 transposase  | Intergenic region between E5165_03950 and E5165_03940 genes         | Metabolic genes                                |
| FPS-S6                 | E5164_03940 | IS982 transposase  | Intergenic region between E5164_03945 and E5164_03935 genes         | Metabolic genes                                |
| 950106-1/1             | H0H25_01690 | ISFps1 transposase | Operon; intergenic region between H0H25_01660 and H0H25_01700 genes | Multidrug transporter                          |
| 160401-1/5N            | E5165_03005 | ISFps1 transposase | Operon; intergenic region between E5165_03035 and E5165_02995 genes | multidrug transporter                          |
| FPS-S6                 | E5164_03000 | ISFps1 transposase | Operon; intergenic region between E5164_03030 and E5164_02990 genes | multidrug transporter                          |
| NCIMB1947 <sup>T</sup> | FPG3_04660  | Transposase        | Gene FPG3_04665                                                     | Antibiotic ABC transporter ATP-binding protein |
| FPS-R7                 | H0H26_11865 | IS204 transposase  | Gene H0H26_11860                                                    | Hypothetical protein                           |
|                        | H0H26_11870 | IS204 transposase  | Gene H0H26_11860                                                    | Hypothetical protein                           |
| FPS-R7                 | H0H26_09920 | IS982 transposase  | Gene H0H26_09915                                                    | Transmembrane protein                          |
| 950106-1/1             | H0H25_02390 | IS256 transposase  | Intergenic region between H0H25_02385 and H0H25_02395 genes         | Transporters                                   |

|                        |             |                           |                                                               |                                                      |
|------------------------|-------------|---------------------------|---------------------------------------------------------------|------------------------------------------------------|
| 160401-1/5N            | E5165_02290 | IS256 transposase         | Intergenic region between E5165_02295 and E5165_02285 genes   | Transporters                                         |
| FPS-S6                 | E5164_02285 | IS256 transposase         | Intergenic region between E5164_02290 and E5164_02280 genes   | Transporters                                         |
| NCIMB1947 <sup>T</sup> | FPG3_04005  | IS4 transposase           | Intergenic region between FPG3_04010 and FPG3_04000 genes     | Transporters                                         |
| NCIMB1947 <sup>T</sup> | FPG3_03390  | IS982 transposase         | Intergenic region between FPG3_03395 and FPG3_03385           | Metabolic genes                                      |
| FPS-R7                 | H0H26_13075 | Transposase domain DUF772 | Intergenic region between H0H26_13070 and H0H26_13080 genes   | Exopolysaccharide transportation                     |
| 950106-1/1             | H0H25_04155 | IS982 transposase         | Gene H0H25_04150                                              | Probable phage protein                               |
| FPS-S6                 | E5164_11140 | IS982 transposase         | Gene E5164_11135                                              | Probable phage protein                               |
| 950106-1/1             | H0H25_04365 | IS256 transposase         | Intergenic region between H0H25_04360 and H0H25_04370 genes   | T9SS sorting signal type C domain-containing protein |
| 160401-1/5N            | E5165_11350 | IS256 transposase         | Intergenic region between E5165_11345 and E5165_11355         | T9SS sorting signal type C domain-containing protein |
| FPS-S6                 | E5164_11355 | IS256 transposase         | Intergenic region between E5164_11350 and E5164_11360         | T9SS sorting signal type C domain-containing protein |
| FPS-R7                 | H0H26_00330 | IS256 transposase         | Intergenic region between H0H26_00325 and H0H26_00335         | Metabolic genes                                      |
| 950106-1/1             | H0H25_05350 | Transposase               | Operon; intergenic region between H0H25_05320 and H0H25_05360 | Metabolic genes                                      |
| 160401-1/5N            | E5165_12350 | Transposase               | Operon; intergenic region between E5165_12320 and E5165_12360 | Metabolic genes                                      |
| FPS-S6                 | E5164_12355 | Transposase               | Operon; intergenic region between                             | Metabolic genes                                      |

|                        |             |                   |                                                               |                                               |
|------------------------|-------------|-------------------|---------------------------------------------------------------|-----------------------------------------------|
|                        |             |                   | E5164_12325 and E5164_12365                                   |                                               |
| NCIMB1947 <sup>T</sup> | FPG3_12250  | IS256 transposase | Intergenic region between FPG3_12245 and FPG3_12255 genes     | Protease                                      |
| FPS-R7                 | H0H26_01265 | IS982 transposase | Intergenic region between H0H26_01260 and H0H26_01270 genes   | Metabolic genes                               |
| FPS-R7                 | H0H26_01930 | IS982 transposase | Operon; Intergenic region between H0H25_06395 and H0H26_01915 | Metabolic genes                               |
| 950106-1/1             | H0H25_06995 | IS3 transposase   | Intergenic region between H0H25_06990 and H0H25_07010 genes   | Hypothetical proteins                         |
| 160401-1/5N            | E5165_01425 | IS3 transposase   | Intergenic region between E5165_01420 and E5165_01440 genes   | Hypothetical proteins                         |
| FPS-S6                 | E5164_01410 | IS3 transposase   | Intergenic region between E5164_01405 and E5164_01425         | Hypothetical proteins                         |
| FPS-R7                 | H0H26_02745 | IS204 transposase | Intergenic region between H0H26_02755 and H0H26_02740         | Metabolic genes                               |
| 950106-1/1             | H0H25_07115 | IS982 transposase | Operon; intergenic region between H0H25_07140 and H0H25_07105 | T9SS type A sorting domain-containing protein |
| 160401-1/5N            | E5165_01540 | IS982 transposase | Operon; intergenic region between E5165_01565 and E5165_01530 | T9SS type A sorting domain-containing protein |
| FPS-S6                 | E5164_01535 | IS982 transposase | Operon; intergenic region between E5164_01560 and E5164_01520 | T9SS type A sorting domain-containing protein |
| 950106-1/1             | H0H25_07375 | Transposase       | Intergenic region between H0H25_07370 and H0H25_07380 genes   | Metabolic genes                               |
| 160401-1/5N            | E5165_09870 | Transposase       | Intergenic region between                                     | Metabolic genes                               |

|                        |             |                   |                                                               |                                       |
|------------------------|-------------|-------------------|---------------------------------------------------------------|---------------------------------------|
|                        |             |                   | E5165_09875 and E5165_09865                                   |                                       |
| FPS-S6                 | E5164_09875 | Transposase       | Intergenic region between E5164_09880 and E5164_09870         | Metabolic genes                       |
| 950106-1/1             | H0H25_07955 | IS256 transposase | Intergenic region between H0H25_07950 and H0H25_07960 genes   | Metabolic genes                       |
| 160401-1/5N            | E5165_09295 | IS256 transposase | Intergenic region between E5165_09300 and E5165_09290 genes   | Metabolic genes                       |
| FPS-S6                 | E5164_09300 | IS256 transposase | Intergenic region between E5164_09305 and E5164_09295         | Metabolic genes                       |
| FPS-R7                 | H0H26_03555 | IS256 transposase | Gene H0H26_03560                                              | Metabolic genes                       |
| NCIMB1947 <sup>T</sup> | FPG3_06805  | IS982 transposase | Intergenic region between FPG3_06810 and FPG3_06795 genes     | virulence-associated e family protein |
| 950106-1/1             | H0H25_08575 | IS982 transposase | Operon; Intergenic region between H0H25_08570 and H0H25_08595 | Gliding motility genes                |
| 160401-1/5N            | E5165_08755 | IS982 transposase | Operon; Intergenic region between E5165_08760 and E5165_08735 | Gliding motility genes                |
| FPS-S6                 | E5164_08745 | IS982 transposase | Operon; Intergenic region between FPG3_07330 and FPG3_07365   | Gliding motility genes                |
| NCIMB1947 <sup>T</sup> | FPG3_08340  | Transposase       | Intergenic region between FPG3_08330 and FPG3_08345           | Metabolic genes                       |
| NCIMB1947 <sup>T</sup> | FPG3_08435  | Tranposase        | Gene FPG3_08440                                               | Putative PepSY_TM-like protein        |
| FPS-R7                 | H0H26_06180 | IS256 transposase | Intergenic region between H0H26_06175 and H0H26_06185         | Metabolic genes                       |
| NCIMB1947 <sup>T</sup> | FPG3_08605  | IS256 transposase | Gene FPG3_08610                                               | Hypothetical protein                  |

|                        |             |                            |                                                                      |                                |
|------------------------|-------------|----------------------------|----------------------------------------------------------------------|--------------------------------|
| FPS-R7                 | H0H26_06345 | IS204<br>transposase       | Intergenic region<br>between<br>H0H26_06340 and<br>H0H26_06355       | Ribosomal<br>proteins          |
|                        | H0H26_06350 | IS204<br>transposase       | Intergenic region<br>between<br>H0H26_06340 and<br>H0H26_06355       | Ribosomal<br>proteins          |
| NCIMB1947 <sup>T</sup> | FPG3_08955  | IS4 transposase            | Operon; Intergenic<br>region between<br>FPG3_08950 and<br>FPG3_08960 | Transporters                   |
| FPS-R7                 | H0H26_07275 | IS200/IS605<br>transposase | Intergenic region<br>between<br>H0H26_07270 and<br>H0H26_07280       | Metabolic genes                |
| 950106-1/1             | H0H25_10330 | IS256<br>transposase       | Gene H0H25_10325                                                     | Collagenase                    |
| FPS-R7                 | H0H26_07015 | IS256<br>transposase       | Gene H0H26_07010                                                     | Collagenase                    |
| 160401-1/5N            | E5165_07010 | IS256<br>transposase       | Gene E5165_07015                                                     | Collagenase                    |
| FPS-S6                 | E5164_07000 | IS256<br>transposase       | Gene E5164_07005                                                     | Collagenase                    |
| 950106-1/1             | H0H25_11590 | Transposase                | Intergenic region<br>between repeat zone<br>and H0H25_11595          | CRISPR array                   |
| FPS-S6                 | E5164_12830 | IS256<br>transposase       | Intergenic region<br>between<br>E5164_12825 and<br>E5164_00935 genes | Leucine-reach<br>repeat region |
