# Supplementary material for: Comparative Genomic Analyses of Flavobacterium psychrophilum Isolates Reveals New Putative Genetic Determinants of Virulence Traits
Source: MDPI journal article supplement (doi:10.3390/microorganisms9081658), 2021-08-03
Supplement: s1 [file s1]

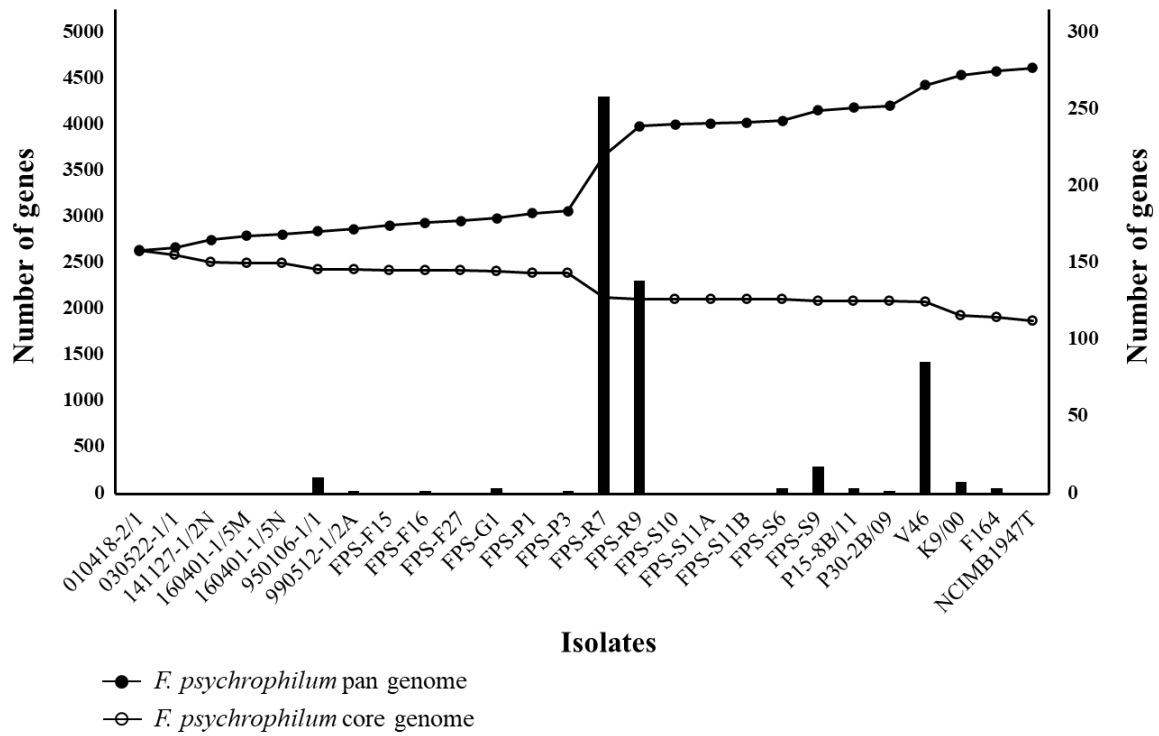

**Figure 1S. *F. psychrophilum* pan, core and accessory genome evolution according to the number of sequenced genomes.** Total number of genes (pan-genome), shared genes (core genome) and unique genes (accessory genome) for a given number of genomes sequentially added.
