# Supplementary material for: Comparative Genomic Analyses of Flavobacterium psychrophilum Isolates Reveals New Putative Genetic Determinants of Virulence Traits
Source: Microorganisms. 2021 Aug 3;9(8):1658. doi: 10.3390/microorganisms9081658 (PMC8400371; doi:10.3390/microorganisms9081658)
Supplement: Supplementary file 1 [file microorganisms-09-01658-s001.zip]

Archive with 8 entries (8 files):
- Table 1S.xlsx
- Table 2S.xlsx
- Table 3S.pdf
- Table 4S.pdf
- Table 5S.pdf
- Figure 1S.pdf
- Figure 2S.pdf
- Figure 3S.pdf
