# Supplementary material for: Comparative Genomic Analyses of Flavobacterium psychrophilum Isolates Reveals New Putative Genetic Determinants of Virulence Traits
Source: Microorganisms. 2021 Aug 3;9(8):1658. doi: 10.3390/microorganisms9081658 (PMC8400371; doi:10.3390/microorganisms9081658)
Supplement: Supplementary file 1 [file microorganisms-09-01658-s001.zip › Table 1S.xlsx]

## Sheet: Hoja1
Table 1S. Characteristics of F. psychrophilum isolates used in this study
Isolate	Origin	Year	Host isolation	Organ	Serotype	ST	CC	Virulence	LD50 (CFU)	6H presence	Accession n° bacteria	Accession n° plasmid	Reference
FPS-G1	Germany	2017	Rainbow trout	Spleen	1	89	10	High	8.90 × 103	No	CP059076	MZ027727	[4]
FPS-F15	Finland	2017	Rainbow trout	Kidney	1	2	10	High	2.22 × 104	No	CP059093	MZ027734	[4]
FPS-P1	Poland	2016	Rainbow trout	Whole fish	1	2	10	High	5.93 × 104	No	JACCML000000000	Not applicable	[4]
FPS-R9	Russia	2017	Rainbow trout	Kidney	1	329	1	High	7.33 × 104	Yes	JACCMN000000000	Not applicable	[4]
FPS-P3	Poland	2017	Rainbow trout	Whole fish	1	2	10	High	7.60 × 104	No	JACCMM000000000	Not applicable	[4]
FPS-S6	Sweden	2017	Rainbow trout	Kidney	2	92	10	High	8.24 × 104	No	CP039119	MW482453	[4]
160401-1/5N	Denmark	2016	Rainbow trout	Kidney	2	92	10	High	9.83 × 104	No	CP039120	MW482451	[4]
P30-2B/09	Finland	2009	Rainbow trout	Lesion	2	91	10	Moderate	1.37 × 105	Yes	CP059177	MZ027728	[4]
F164	Sweden	1996	Rainbow trout	Kidney	2	240	10	Moderate	1.40 × 105	No	CP059077	Not applicable	[4]
FPS-F16	Finland	2017	Rainbow trout	Kidney	1	2	10	Moderate	1.44 × 105	No	CP059101	Not applicable	[4]
V46	Finland	2005	Rainbow trout	Spleen	0	138	138	Moderate	1.50 × 105	No	JACEMV000000000	Not applicable	[4]
FPS-S11A	Sweden	2017	Rainbow trout	Kidney	2	92	10	Moderate	1.85 × 105	No	CP059103	MZ027729	[4]
990512-1/2A	Denmark	1999	Rainbow trout	Kidney	2	2	10	Moderate	2.06 × 105	No	CP059096	MZ027735	[4]
141127-1/2N	Denmark	2014	Rainbow trout	Kidney	2	92	10	Moderate	3.56 × 105	No	CP059095	MZ027731	[4]
P15-8B/11	Finland	2011	Rainbow trout	Kidney	1	2	10	Moderate	3.58 × 105	No	CP059176	MZ027736	[4]
160401-1/5M	Denmark	2016	Rainbow trout	Spleen	2	92	10	Moderate	3.73 × 105	No	CP059097	MZ027732	[4]
FPS-F27	Finland	2017	Rainbow trout	Kidney	1	2	10	Moderate	4.33 × 105	No	CP059100	MZ027737	[4]
FPS-R7	Russia	2017	Rainbow trout	Kidney	0	328	S	Moderate	6.16 × 105	Yes	CP059075	Not applicable	[4]
FPS-S9	Sweden	2017	Rainbow trout	Kidney	1	2	10	Moderate	6.83 × 105	No	CP059099	Not applicable	[4]
030522-1/1	Denmark	2003	Rainbow trout	Spleen	2	2	10	Moderate	7.57 × 105	Yes	CP059098	MZ027738	[4]
FPS-S10	Sweden	2017	Rainbow trout	Kidney	1	2	10	Weak	1.36 × 106	No	CP059102	Not applicable	[4]
010418-2/1	Denmark	2001	Rainbow trout	Spleen	2	10	10	Weak	2.13 × 106	Yes	CP059094	MZ027739	[4]
K9/00	Finland	2000	Rainbow trout	Spleen	1	79	10	Weak	2.62 × 106	No	CP059104	Not applicable	[71]
950106-1/1	Denmark	1995	Rainbow trout	Spleen	1	2	10	Weak	2.64 × 106	Yes	CP008902	MZ027733	[6]
NCIMB1947T	USA	1989	Coho salmon	Kidney	0	13	9	Weak	3.10 × 106	Yes	CP007207	Not applicable	[17]
FPS-S11B	Sweden	2017	Rainbow trout	Kidney	2	92	10	Non-virulent	ND	No	CP059105	MZ027730	[4]
