# Supplementary material for: Comparative Genomic Analyses of Flavobacterium psychrophilum Isolates Reveals New Putative Genetic Determinants of Virulence Traits
Source: Microorganisms. 2021 Aug 3;9(8):1658. doi: 10.3390/microorganisms9081658 (PMC8400371; doi:10.3390/microorganisms9081658)
Supplement: Supplementary file 1 [file microorganisms-09-01658-s001.zip › Table 2S.xlsx]

## Sheet: genes involed in virulance
Table 2S. Distribution of putative virulence-related factors in F. psychrophilum isolates
				HIGH VIRULENCE							MODERATE VIRULENCE													LOW VIRULENCE					NON VIRULENT
				Germany	Finland	Poland	Russia	Poland	Sweden	Denmark	Finland	Finland	Finland	Finland	Sweden	Denmark	Denmark	Finland	Denmark	Finland	Russia	Sweden	Denmark	Sweden	Denmark	Finland	Denmark	USA	Sweden
				FPS-G1	FPS-F15	FPS-P1	FPS-R9	FPS-P3	FPS-S6	FPS-DK221	P30-2B/09	FPS-F164	FPS-F16	FPS-V46	FPS-S11A	FPS-DK113	FPS-DK215	P15-8B/11	FPS-DK220	FPS-F27	FPS-R7	FPS-S9	FPS-DK100	FPS-S10	FPS-DK109	FPS K9/00	FPS-DK004	NCIMB1947	FPS-S11B
VIRULENCE GENES from Rast	Resistance to antibiotics and toxic compounds	Beta-lactamase	Beta-lactamase
			Metal-dependent hydrolases of the beta-lactamase superfamily I or PhnP protein (BLI) (FP1098) (1)
		Resistance to Fluoroquinilones	Topoisomerase IV subunit A (parC) (FP0649)
			Topoisomerase IV subunit B (parE) (FP0646)
			DNA gyrase subunit A (EC 5.99.1.3) (gyrA) (FP0748)
			DNA gyrase subunit B (EC 5.99.1.3) (gyrB) (FP0527)
		Cobalt-Zinc-Cadmium Resistance	Cobalt-zinc-cadmium resistance protein CzcD (FP2486)
			Probable Co/Zn/Cd efflux system membrane fusion protein (FP) (342bp) (FP2032)
			Probable Co/Zn/Cd efflux system membrane fusion protein (FP) (1131bp) (FP0923)
			Probable Co/Zn/Cd efflux system membrane fusion protein (FP) (1182 bp) (FP0881)
			Cobalt-zinc-cadmium resistance protein CzcA or Cation efflux system protein CusA (FP0880)
			Transcriptional regulator, MerR family (TRMer) (FP1448)
		Copper Homeostasis	Lead, cadmium, zinc and mercury transporting ATPase or Copper-translocating P-type ATPase (FP0426)
			Type cbb3 cytochrome oxidase biogenesis protein CcoI or Copper-translocating P-type ATPase (FP1153)
			Multicopper oxidase
		Multidrug Resistance Efllux Pumps	Multidrug-efflux transporter, major facilitator superfamily (MFS) (TC 2.A.1) or Efflux pump Lde
			RND multidrug efflux transporter or Acriflavin resistance protein (FP1809)
			Multi antimicrobial extrusion protein (Na(+)/drug antiporter), MATE family of MDR efflux pumps
	Invasion and intracellular resistance	Mycobacterium Virulence Operon Involved in Protein Synthesis (SSU Ribosomal Proteins)	SSU ribosomal protein S12p (S23e) (Rv0682) (FP1343)
			SSU ribosomal protein S7p (S5e) (Rv0683) (FP1342)
			Translation elongation factor G (Rv0684) (FP1341)
			Translation elongation factor Tu (Rv0685) (FP1184)
		Mycobacterium Virulence Operon Involved in DNA Transcription	DNA-directed RNA polymerase beta subunit (Rv0667) (FP1175)
			DNA-directed RNA polymerase beta' subunit (Rv0668) (FP1176)
			Internalin, putative (2481 bp) (FP0006)
			Internalin, putative (9978 bp) (FP0016)
		Mycobacterium Virulence Operon Involved in Protein Synthesis (LSU Ribosomal Proteins)	Translation initiation factor 3 (Rv1641) (FP0894)
			LSU ribosomal protein L35p (Rv1642) ( FP0893)
			LSU ribosomal protein L20p (Rv1643) (FP0892)
STRESS RESPONSE GENES from RAST	Osmotic stress		Outer membrane protein A precursor (FP0684)
	Oxidative stress	Oxidative Stress	Nitrite-sensitive transcriptional repressor NsrR (FP1858)
			Ferric uptake regulation protein FUR (FP1903)
			Alkyl hydroperoxide reductase subunit C-like protein (732bp) (FP0914)
			Alkyl hydroperoxide reductase subunit C-like protein (639 bp) (FP1729)
			Alkyl hydroperoxide reductase subunit C-like protein (459bp) (FP1790)
			Transcriptional regulator, Crp/Fnr family (678bp) (FP0703)
			Transcriptional regulator, Crp/Fnr family (627bp) (FP0925)
			Transcriptional regulator, Crp/Fnr family (681bp) (FP1152)
			Superoxide dismutase [Cu-Zn] precursor (FP1736)
			Superoxide dismutase [Mn] (606 bp) (FP0160)
			Superoxide dismutase [Mn] (867 bp) (FP0608)
		Glutathoine: Redox Cycle	Glutathione peroxidase and Thioredoxin peroxidase (FP1417)
	Detoxification	Uptake of Selenate and Selenite	DedA protein (FP2028)
	No-subcategory	Dimethylarginine metabolism	NG,NG-dimethylarginine dimethylaminohydrolase 1 (FP1307)
			Ornithine aminotransferase (FP0739)
	Periplasmic Stress	Periplasmic Stress esponse	Intramembrane protease RasP/YluC, implicated in cell division based on FtsL cleavage (FP0081)
			Outer membrane protein H precursor (570bp) (FP2303)
			Outer membrane protein H precursor (564 bp) (FP0005)
			Periplasmic chaperone of outer membrane proteins Skp and Outer membrane protein H precursor (963bp) (FP2097)
			Periplasmic chaperone of outer membrane proteins Skp and Outer membrane protein H precursor (501bp) (FP2098)
	Pathogenicity islands		Thiol-activated cytolysin (LLO) (FP0097)
		GLIDING MOTILITY GENES from McBride, Zhu 2013	Gliding_motility_protein_GldA_(gldA) (FP0252)
			Gliding motility lipoprotein precursor GldB (gldB) (FP2069)
			Gliding motility protein GldC (gldC) (FP2068)
			Gliding motility lipoprotein precursor GldD (gldD) (FP1663)
			Gliding motility transmembrane protein GldF (gldF) (FP1089)																													Not present
			Gliding motility transmembrane protein GldG (gldG) (FP1090)																													Present (1 copy)
			Gliding motility lipoprotein precursor GldH (gldH) (FP0024)
			Gliding motility lipoprotein precursor GldI (gldI) (FP1892)
			Gliding motility lipoprotein precursor GldJ (gldJ) (FP1389)
		PorSS GENES from McBride, Zhu 2013	Gliding motility lipoprotein precursor GldK (gldK) (FP1973)
			Gliding motility transmembrane protein GldL (gldL) (FP1972)
			Gliding motility transmembrane protein GldM (gldM) (FP1971)
			Gliding motility protein precursor GldN (gldN) (FP1970)
			Putative adhesin precursor SprA (sprA) (FP2121)
			SprE lipoprotein precursor (sprE) (FP2467)
			PorT protein precursor (porT) (FP0326)
		PROTEASE GENES from Duchaud et al, 2007	zinc_metalloprotease_precursor_(FP0081)
			M1_family_metalloprotease_precursor_(FP0082)
			M13_family_metallopeptidase_PepO_precursor_(FP0086)
			Psychrophilic_metalloprotease_Fpp1_precursor_(FP0231)
			Psychrophilic_metalloprotease_Fpp2_precursor_(FP0232)
			Probable_M36_fungalysin_family_metalloprotease_precursor_(FP0280)
			Probable_M36_fungalysin_family_metalloprotease_precursor_(FP0281)
			Probable_M43_cytophagalysin_family_metalloprotease_precursor_(FP1024)
			Probable_M43_cytophagalysin_family_metalloprotease_precursor_(FP1619)
			Probable_S8_subtilisin_family_serine_endopeptidase_precursor_(FP1763)
			Truncated_collagenase_precursor_(insertion sequence disrupted)_(FP1777)
			Truncated_collagenase_precursor_(insertion sequence disrupted)_(FP1776)
			Probable_M48_Family_membrane-associated_zinc_metalloprotease_precursor_(FP2364)
			Probable_S8_subtilisin_family_serine_endopeptidase_precursor_(FP2396)
			Putative_hemolysin_(FP0063)
			Flavomodulin_(FP0097)
		ADHESION GENES from Duchaud 2007	Probable cell surface protein (Leucin-rich repeat protein) (FP0166)
			Probable cell surface protein (Leucin-rich repeat protein) (FP0167)
			Probable cell surface protein (Leucin-rich repeat protein) (FP0168)
			Probable cell surface protein (Leucin-rich repeat protein) (FP0169)
			Probable cell surface protein (Leucin-rich repeat protein) (FP0170)
			Probable cell surface protein (Leucin-rich repeat protein) (FP0171)
			Probable cell surface protein (Leucin-rich repeat protein) (FP0172)
			Probable cell surface protein (Leucin-rich repeat protein) (FP0173)
			Probable cell surface protein (Leucin-rich repeat protein) (FP0174)
			Probable cell surface protein (Leucin-rich repeat protein) (FP0175)
			Probable cell surface protein (Leucin-rich repeat protein) (FP0176)
			Probable cell surface protein (Leucin-rich repeat protein) (FP0177)
			Probable cell surface protein (Leucin-rich repeat protein) (FP0178)
			Probable cell surface protein (Leucin-rich repeat protein) (FP0179)
			Probable cell surface protein (Leucin-rich repeat protein) (FP0180)
			Protein of unknown function; putative adhesin (FP2413) (claF)
			Protein of unknown function; putative adhesin (FP1830)
			Putative adhesin precursor SprB (FP0016)
			Protein of unknown function; putative adhesin (FP0595)
			Protein of unknown function; putative adhesin (FP0006)
			Protein of unknown function; putative adhesin (FP1655)
			Protein of unknown function; putative adhesin (FP1499)
			Protein of unknown function; putative adhesin (FP1661)
			Protein of unknown function; putative adhesin (FP1959)
			Protein of unknown function; putative adhesin (FP2244)
			Protein of unknown function; putative adhesin (FP0616)
		CELL SURFACE PROTEINS from Duchaud 2007	Probable glycoside hydrolase (FP0087)
			Protein of unknown function (FP0120)
			Putative outer membrane protein precursor (FP0121)
			Protein of unknown function precursor; putative immunoreactive 84 kDa antigen (FP0270)
			Probable extracellular ribonuclease precursor (FP0696)
			Probable ribonuclease precursor (FP0721)
			Pseudo (FP1023)
			Protein of unknown function precursor (FP1479)
			Esterase/lipase/thioesterase family protein precursor (FP1731)
			Protein of unknown function precursor; putative adhesin (FP1830)
			RCC1 (Regulator of Chromosome Condensation) repeat domain protein precursor (FP2463)
